# Supplementary material
Source: publisher site journal article supplement (https://www.dovepress.com/get_supplementary_file.php?f=380832.docx)
Supplement: Supplementary file 1 [file get_supplementary_file.php]

# Supplementary materials

Supplementary table 1: Interview guide – Patients declining pulmonary rehabilitation (PR) with/without experience of PR

| **Questions about declining pulmonary rehabilitation** | | |
| --- | --- | --- |
| **Domain** | **Constructs** | **Interview questions** |
| Knowledge | Knowledge  Procedural knowledge  Knowledge of task environment | **What do you know about pulmonary rehabilitation?**  (personal experience/ heard about from others)  *Support questions:*   - What do you think pulmonary rehabilitation entails? - What do you think is the purpose of pulmonary rehabilitation?   **Why do you think pulmonary rehabilitation is relevant to you?** |
| Intentions | Stability of intentions  Stages of change model  Transtheoretical model and stages of change | **Can you tell me why you have declined participation in pulmonary rehabilitation (this time)?**  *Support questions:*   - What was the main reason why you didn’t want or choose to participate in pulmonary rehabilitation? - Are there any other impediments? (Lack of time, competing activities, responsibilities, other medical conditions which impede the ability to participate)   **How does having COPD influence your everyday life?**   - What is important to you? |
| Memory, attention, and decision processes | Memory  Attention  Attention control  Decision making  Cognitive overload/tiredness | **Did you discuss your decision (about not participating in pulmonary rehabilitation) with a close relative?**  *Support questions:*   - Did you experience that someone in your social circle wanted/encouraged you to participate in pulmonary rehabilitation?   **Did their attitudes affect your decision?** |
| Social influences | Social pressure  Social norms  Group conformity  Social comparisons  Group norms  Social support  Power  Intergroup conflict  Alienation  Group identity  Modelling | **Last time you were offered to participate in pulmonary rehabilitation, do you recall who was the first person to bring it up?**  *Support questions:*   - *How did he/she describe pulmonary rehabilitation?* - *Is it important for you which healthcare professional recommended pulmonary rehabilitation (e.g. a doctor or a nurse)? Can you please elaborate.*   **Which attitudes have you met when talking to healthcare professionals** **about pulmonary rehabilitation?**  *Support questions:*   - How did the healthcare professionals’ attitude towards pulmonary rehabilitation influence your choice about participation? - How can the healthcare professionals (doctors, nurses, physiotherapists) support and inform you in the best way about pulmonary rehabilitation? |
| Environmental context and resources | Environmental stressors  Resources / material resources  Organizational culture/ climate  Salient events/critical incidents  Person x environment interaction  Barriers and facilitators | **How does location, time and duration of pulmonary rehabilitation influence your choice about participation?**  *Support questions:*   - Is/was the location acceptable? - Was the season important to you (winter/spring/summer/autumn)? - Was the time of day important to you? |
| Emotions | Fear  Anxiety  Affect  Stress  Depression  Positive / negative affect  Burn-out | **Did you experience any kind of feelings being offered pulmonary rehabilitation?**  **Did you experience any kind of feelings when you turned down the offer to participate in pulmonary rehabilitation?**  (e.g. joy, neutral, sadness, bad consciousness)   - How did this affect you? |
| Skills | Skills  Skills development  Competence  Ability  Interpersonal skills  Practice  Skill assessment | *For participants with previous experience with PR:*  **What have you learned from your previous participation in pulmonary rehabilitation?**  **What do you think it would take for you to be able to participate in pulmonary rehabilitation?**   - Own skills? - Skills of others?  (cognitive/physically/socially/communicative) |
| Beliefs about capabilities | Self-confidence  Perceived competence  Self-efficacy  Perceived behavioural control  Beliefs  Self-esteem  Empowerment  Professional confidence | **Do you believe that you would be capable of completing a pulmonary rehabilitation program?**  (Physically/emotionally/socially)  *Support questions:*   - What do you think would be difficult? - What would be easy? - Is there anything that you would not be able to do?   **Would you feel comfortable participating in pulmonary rehabilitation?**  *Support questions:*   - What would it take for you to feel comfortable? - What can make you feel precarious about participating? |
| Social/  professional role and identity | Professional identity  Professional role  Social identity  Identity  Professional boundaries  Professional confidence  Group identity  Leadership  Organizational commitment | **How does it affect you that pulmonary rehabilitation is group-based?** |
| Social influences | Social pressure  Social norms  Group conformity  Social comparisons  Group norms  Social support  Power  Intergroup conflict  Alienation  Group identity  Modelling | **Do you believe that your participation would have a positive influence on others?**   - Can you please explain how? |
| Beliefs about consequences | Beliefs  Outcome expectancies  Characteristics of outcome expectancies  Anticipated regret  Consequents | **How do you think pulmonary rehabilitation would affect you?**  **What disadvantages do you believe is related to pulmonary rehabilitation?**  **Do the advantages make up for the disadvantages?**  **Would you have to make changes in your everyday life in order to be able to participate in pulmonary rehabilitation?** |
| Optimism | Optimism  Pessimism  Unrealistic optimism  Identity | *(based on the replies above)*  **Do you believe that pulmonary rehabilitation can make a difference for you?**  **What would you like to achieve by participating?**  **What do you think you cannot achieve?** |
| Goals | Goals (distal / proximal)  Goal priority  Goal / target setting  Goals (autonomous / controlled)  Action planning  Implementation intention | **What would you be able to achieve by participating in pulmonary rehabilitation?**  (For yourself/family/relations/others?)  *Support questions:*   - What is most important for you to obtain? - When would you consider the rehabilitation program to be successful? |
| Reinforcement | Rewards  Incentives  Punishment  Consequents  Reinforcement  Contingencies  Sanctions | **Would you consider participating sometime in the future?**  *Support questions:*   - What would it take for you to reconsider participating? - Is there anything else/situations/people that could make you reconsider participating? |
| Behavioural regulation | Self-monitoring  Breaking habit  Action planning | **Who would have to do what differently, in order for you to accept participating in pulmonary rehabilitation?** |
| **Questions concerning telerehabilitation (PTR)** | | |
| Domain | Constructs | Interview questions |
| Knowledge | Knowledge  Procedural knowledge  Knowledge of task environment | **What do you know about telerehabilitation?**  *Support questions:*   - What do you think telerehabilitation entails?   **Do you have experience with video consultations or similar (telemedicine)?** |
| Environmental context and resources | Environmental stressors  Resources / material resources  Organizational culture/ climate  Salient events/critical incidents  Person x environment interaction  Barriers and facilitators | **What would it mean to you if you would be able to participate from home?** |
| Skills | Skills  Skills development  Competence  Ability  Interpersonal skills  Practice  Skill assessment | **What do you think it would take for you to be able to participate in telerehabilitation?**   - **What would it take from you?** (cognitive/physically/socially/communicative) - **What would it take from others?**   (cognitive/physically/socially/communicative) |
| Social/  professional role and identity | Professional identity  Professional role  Social identity  Identity  Professional boundaries  Professional confidence  Group identity  Leadership  Organizational commitment | **How would it affect you that telerehabilitation takes place on a screen/separately?** |
| Social influences | Social pressure  Social norms  Group conformity  Social comparisons  Group norms  Social support  Power  Intergroup conflict  Alienation  Group identity  Modelling | **Do you believe that your participation would have a positive influence on others?**   - Can you please explain how? |
| Beliefs about consequences | Beliefs  Outcome expectancies  Characteristics of outcome expectancies  Anticipated regret  Consequents | **What advantages and disadvantages would telerehabilitation have for you?**  **Would you have to make changes in your everyday life in order to be able to participate in telerehabilitation?** |
| Beliefs about capabilities | Self-confidence  Perceived competence  Self-efficacy  Perceived behavioural control  Beliefs  Self-esteem  Empowerment  Professional confidence | **Do you believe that you would be capable of completing a telerehabilitation program?**  (Physically/emotionally/socially)  *Support questions:*   - What do you think would be difficult? - What would be easy? - Is there anything that you would not be able to do? - How often would you like to participate? - For how long would you be able to exercise each time?   **Would you feel comfortable participating in telerehabilitation?**  *Support questions:*   - What would it take for you to feel comfortable? - What can make you feel precarious about participating? |
| Optimism | Optimism  Pessimism  Unrealistic optimism  Identity | **Do you believe that telerehabilitation can make a difference for you?**  *If yes: how?*  *If no: why not?*  *Support questions:*   - What would you like to achieve by participating? - What do you think you cannot achieve? |
| Emotions | Fear  Anxiety  Affect  Stress  Depression  Positive / negative affect  Burn-out | **What kind of feelings and thoughts would arise if you were offered to participate in telerehabilitation?** |
| Reinforcement | Rewards  Incentives  Punishment  Consequents  Reinforcement  Contingencies  Sanctions | **What could strengthen/maintain your motivation to participate in telerehabilitation?**  *Support questions:*  Which elements should telerehabilitation contain in order to motivate you/have relevance for you? |
| Goals | Goals (distal / proximal)  Goal priority  Goal / target setting  Goals (autonomous / controlled)  Action planning  Implementation intention | **What would you be able to achieve by participating in telerehabilitation?**  (For yourself/family/relations/others?)  *Support questions:*   - What is most important for you to obtain? - When would you consider the telerehabilitation program to be successful? |
| Behavioural regulation | Self-monitoring  Breaking habit  Action planning | **Who would have to do what differently, in order for you to accept participating in pulmonary telerehabilitation?**  **Do you have any ideas, thoughts, or points of view that you would like to share concerning exercise using a screen/tablet?** |
| **Thank you for your time** | | |

Supplementary table 2: Merging process

| Survey (Quantitative data) | Interview (Qualitative data) | Merged themes (and subthemes) |
| --- | --- | --- |
| - Motivation for PTR - Believing in effect of PTR - Daily use of tablet/ CPU - Use of social media | - Convenience of participation and flexibility - Context - PTR´s impact of daily living - Beliefs of capabilities - Beliefs about consequences and capabilities regarding the possible effect of PTR - Physical challenges in relation to co-morbidities - Technological skills - Previous experiences with technologies - Extent of PTR (time, duration) | 1. Reinforcement to participate in pulmonary tele-rehabilitation    1. Social influences |
| - Believes about PTR being as beneficial as PR - Daily use of tablet/CPU - Self-rated technical capability - Demographic variables: - Gender, age, length of education, number of comorbidities, previous PR participation | - Beliefs of capabilities - Beliefs about consequences and capabilities regarding the possible effect of PTR - Physical challenges in relation to co-morbidities - Technological skills - Previous experiences with technologies - Extent of PTR (time, duration) | 1. Belief of capabilities and benefits in pulmonary tele-rehabilitation   2.1) Physical challenges in relation to co-morbidities  2.2) Beliefs of capabilities regarding technical skills |
| - Thoughts about safety regarding PTR | - Willingness to participate in PTR - Group vs individual setting - The screen as a protector or barrier - Feeling supported and looked after | 1. The screen as a protector or a barrier   3.1) Feeling supported and looked after |
| - Convenience of participation - Time saving - Flexibility | - Convenience of participation and flexibility - Context - PTR´s impact of daily living | 1. Convenience of participation and flexibility   4.1.) Environmental context  4.2) PTR´s impact on daily living |
| - Preferences for group activities - Preferences for individual exercising - Content of PTR | - Thoughts on and preferences for content in PTR - Oral or written communication | 1. Thoughts on and preferences for content in PTR   5.1) Extent of PTR (time, duration)  5.2) Oral or written communication |

| Supplementary table 3: Reasons to decline pulmonary rehabilitation, quantitative data | | |
| --- | --- | --- |
| **Variables** | **All (%)**  **(N = 84)** | **Missing** |
| **For what reasons did you decline PR this time?** |  |  |
| Transport | 22 (26.2%) |  |
| Location | 9 (10.7%) |  |
| Point of time | 20 (23.8%) |  |
| Not motivated/ not relevant | 18 (21.4%) |  |
| Bad experiences with content and participation | 17 (20.2%) |  |
| I do not know what it's about | 5 (6.0%) |  |
| My COPD disease keeps me from going | 32 (38.1%) |  |
| Another disease keeps me from going | 10 (11.9%) |  |
| Other things | 7 (8.3%) |  |
| **Has a doctor or nurse recommended that you participate in PR?** |  |  |
| Yes, a doctor | 44 (52.4%) |  |
| Yes, a nurse | 52 (61.9%) |  |
| No | 13 (15.5%) |  |
| **Has a doctor or nurse told you how much you should exercise and be active?** |  |  |
| Yes, I know what to do | 55 (65.5%) |  |
| Yes, but I´m not sure what to do | 2 (2.4%) |  |
| Yes, but I´m not able to do it | 14 (16.7%) |  |
| Yes, but I´m insecure | 1 (1.2%) |  |
| No | 12 (14.3%) |  |
| **To what extent were you informed about what PR includes?** |  |  |
| To a very large extent | 20 (23.8%) |  |
| To a large extent | 23 (27.4%) |  |
| To some extent | 23 (27.4%) |  |
| To a lesser extent | 9 (10.7%) |  |
| Not at all | 9 (10.7%) |  |
| **To what extent were you informed about the importance of participating in PR?** |  |  |
| To a very large extent | 22 (26.2%) |  |
| To a large extent | 28 (33.3%) |  |
| To some extent | 17 (20.2%) |  |
| To a lesser extent | 7 (8.3%) |  |
| Not at all | 10 (11.9%) |  |
| **Will you reconsider participating another time?** |  | 1 (1.2%) |
| Yes | 53 (63.9%) |  |
| No | 30 (36.1%) |  |

Supplementary table 4: Reasons to decline pulmonary rehabilitation, quantitative data

| **Variables** | **All  n (%)**  **(n = 84)** | ***Previous experience with PR  n (%)***  ***(n = 52)*** | ***Naive to PR  n (%)***  ***(n = 32)*** |
| --- | --- | --- | --- |
| **For what reasons did you decline PR this time?** |  |  |  |
| Transport | 22 (26.2) | 12 (23) | 10 (31) |
| Location | 9 (10.7) | 6 (12) | 3 (9) |
| Point of time | 20 (23.8) | 9 (17) | 11 (34) |
| Not motivated/ not relevant | 18 (21.4) | 7 (14)* | 11 (34)* |
| Bad experiences with content and participation | 17 (20.2) | 6 (31)* | 0 (0)* |
| I do not know what it's about | 5 (6.0) | 1 (2) | 4 (13) |
| My COPD disease keeps me from going | 32 (38.1) | 27 (52)* | 5 (16)* |
| Another disease keeps me from going | 10 (11.9) | 8 (15) | 2(6) |
| Other things | 7 (8.3) | 4 (8) | 3 (9) |
| **Has a doctor or nurse recommended that you participate in PR?** |  |  |  |
| Yes, a doctor | 44 (52.4) | 31 (60) | 13 (41) |
| Yes, a nurse | 52 (61.9) | 31 (60) | 21 (66) |
| No | 13 (15.5) | 6 (12) | 7 (22) |
| **Has a doctor or nurse told you how much you should exercise and be active?** |  |  |  |
| Yes, I know what to do | 55 (65.5) | 35 (67) | 20 (63) |
| Yes, but I´m not sure what to do | 2 (2.4) | 0 (0) | 2 (6) |
| Yes, but I´m not able to do it | 14 (16.7) | 8 (15) | 6 (19) |
| Yes, but I´m insecure | 1 (1.2) | 0 (0) | 1 (3) |
| No | 12 (14.3) | 9 (17) | 3 (9) |
| **To what extent were you informed about what PR includes?** |  |  |  |
| To a very large extent | 20 (23.8) | 16 (30) | 4 (13) |
| To a large extent | 23 (27.4) | 14 (27) | 9 (28) |
| To some extent | 23 (27.4) | 12 (23) | 11 (33) |
| To a lesser extent | 9 (10.7) | 5 (10) | 4 (13) |
| Not at all | 9 (10.7) | 5 (10) | 4 (13) |
| **To what extent were you informed about the importance of participating in PR?** |  |  |  |
| To a very large extent | 22 (26.2) | 18 (34) | 4 (13) |
| To a large extent | 28 (33.3) | 16 (31) | 12 (38) |
| To some extent | 17 (20.2) | 8 (15) | 9 (28) |
| To a lesser extent | 7 (8.3) | 4 (8) | 3 (8) |
| Not at all | 10 (11.9) | 6 (12) | 4 (13) |
| **Will you reconsider participating another time?** |  |  |  |
| Yes | 53 (63.9) | 35 (69) | 18 (56) |
| No | 30 (36.1) | 16 (31) | 14 (44) |

Statistically significant difference between naïve and experience with PR denoted *p<0.05

| Supplementary table 5: Reasons for declining participation in pulmonary rehabilitation (PR) – qualitative data   | **Themes** | **Subthemes** | **Citations** | | --- | --- | --- | | 1. Lack of belief that PR matches preferences and functional level | Social influences  Social/Professional role and identity  Beliefs about capabilities in relation to physical limitations  Obligation | *“...nor would I want others to see me, or be worried about how I feel” (A)*  *“So, if they tailor it for someone with low function, I will feel that I am wasting my time, and if it is tailored for my level of functioning, it would be the death of the other participants ”(D)* | | 1. Barriers in the? environmental context | Environmental context and resources  Behavioral regulation | *“You could spend 2½ hours on transportation and then 45 minutes on gymnastics – that’s not much fun” (C)*  *“Someone had to come and take me by the scruff of the neck. Someone who is waiting for me and says: "now you have to go exercise". That would be nice” (A)* | | 1. Ambivalence in relation to beliefs of effect | Previous experience importance for rejecting PR  Social influences | *“Because, well, you always have that little doubt about, “does it work, is it worth the effort? How sore do I get from it?” (D)*  *Yes, I would do it for her sake, I love my daughter. Yes, and then she says: “you should take a walk more often”. "yes, yes I will" (F)* | | 1. Lack of involvement in decision-making about participation | Memory, attention, and decision process  Knowledge  Social influences | *“No, I'm taking care of it myself. No, no one should be the boss of me (E)*  *“No, it's a decision I make for myself. It's me who's going to do it (the exercises), so no, it's something I decide for myself” (participant B).* |   Supplementary table 6: Thoughts and attitudes towards hypothetical participation in pulmonary tele-rehabilitation   | Themes | Subthemes | | --- | --- | | 1. Convenience of participation and flexibility | Context  PTR´s impact of daily living | | Beliefs of capabilities | Beliefs about consequences and capabilities regarding the possible effect of PTR Physical challenges in relation to co-morbidities  Technological skills  Previous experiences with technologies  Extent of PTR (time, duration) | | Willingness to participate in PTR | Group vs individual setting  The screen as a protector or barrier  Feeling supported and looked after | | 1. Thoughts on and preferences for content in PTR | Oral or written communication |   Supplementary table 7: Participants characteristics by willingness to participate in pulmonary telerehabilitation | | | |
| --- | --- | --- | --- | --- | --- | --- | --- | --- | --- | --- | --- | --- | --- | --- | --- | --- | --- | --- | --- | --- | --- | --- | --- | --- | --- | --- | --- | --- |
| Variables | Willing  (Strongly agree/agree)  (n = 23) | Undecided (n = 24) | Not willing  (disagree, strongly disagree)   (n = 36) |
| Female sex, n (%) | 13 (57) | 17 (71) | 21 (58) |
| Age, yr | 70.6 (7.1) | 68.2 (8.8) | 71.4 (9.9) |
| Educational level, <10/10-12/≥13 yr, (%) | 74/9/17 | 75/17/8 | 50/31/19 |
| Marital status, n (%)  Married/living with partner  Living alone | 12 (52)  11 (48) | 10 (42)  14 (58) | 18 (50)  18 (50) |
| Body mass index, kg/m2 | 25.6 (5.2) | 26.9 (8.0) | 23.7 (11.9) |
| FEV1, % predicted | 33.1 (13.3) | 35.3 (9.6) | 32.8 (11.9) |
| GOLD I/II/III/IV, % | 0/0/48/52 | 0/0/71/29 | 0/8/39/53 |
| A/B/C/D, % | 0/48/9/43 | 0/38/4/58 | 0/61/0/39 |
| LTOT, n (%) | 5 (22) | 3 (13) | 4 (11) |
| SpO2 at rest (%) | 95.2 (2.8) | 95.5 (1.9) | 94.8 (2.1) |
| MRC 1/2/3/4/5, % | 0/9/26/35/30 | 0/0/32/46/21 | 0/8/31/36/25 |
| Smoking status, n (%)  Never  Former  Current  Pack-year history | 1(4) 20 (87) 2 (9)  40.3 (16.6) | 0 (0) 20 (83) 4 (17)  41.3 (16.6) | 2(5) 28 (78) 6 (17)  45.9 (27.0) |
| BODE index points, median (IQR) | 6.0 (4; 7) | 6.0 (4; 7) | 5.0 (4;7) |
| Charlson comorbidity index 1/2/≥3, (%)  Number of comorbidities 1/2/≥3, (%) | 4/65/31  0/30/70 | 17/42/41  8/29/63 | 22/25/53  8/39/53 |
| Exacerbations, previous 12-month, (median, IQR) | 1 (0; 2) | 1 (0; 2) | 0 (0; 1) |
| Walking aid, walker/other/none, n  Indoor/outdoor/both, n | 12/1/10  1/20/2 | 13/0/11 1/22/1 | 16/0/20 3/30/3 |
| SPPB total points, median (IQR)  Balance, seconds  Gait speed, seconds  5STS, seconds  Floor effect 5STS, n (%) | 9.0 (7;11)  30.0 (30; 30)  4.3 (3.4; 6.1)  12.4 (10.0; 17.0)  2 (9) | 7.0 (3; 10)  30.0 (15; 30)  6.8 (3.6; 10.4)  13.2 (10.5; 19.3)  4 (17) | 10.0 (6; 11)  28.0 (26; 30)  4.5 (3.2; 5.3)  13.9 (9.6; 15.1)  10 (28) |
| Daily step count, steps, median (IQR) # | 1796 (921; 2878) | 1298 (701; 2499) | 2292 (906; 4125) |
| CAT, score points | 18.0 (7.0) | 21.2 (6.6) | 17.2 (5.0) |
| HADS, score points  HADS-Anxiety  HADS-Depression | 5.1 (2.5)  3.6 (3.9) | 7.5 (4.7)  5.8 (3.8) | 4.5 (3.2)  2.9 (2.3) |
| EQ-5D, VAS score  EQ-5D, index score | 60.4 (20.1)  0.70 (0.14) | 54.2 (18.5)  0.60 (0.29) | 58.3 (16.1)  0.75 (0.12) |
| Pulmonary rehabilitation, naïve/ previously, (%)  Years since previous PR participation, median (IQR) | 35/65  2017 (2015; 2018) | 29/71  2017 (2016; 2019) | 47/53  2015 (2013; 2018) |
| Use smartphones, n (%)  Daily  Frequently/occasionally  Rarely/never | 21 (91)  2 (9)  0 (0) | 17 (71)  3(12)  4 (17) | 25 (69)  1 (3)  10 (28) |
| Use Tablet or computer, n (%)  Daily  Frequently/occasionally  Rarely/never  Missing | 19 (83)  3 (13)  1 (4)  0 (0) | 14 (58)  7 (30)  3 (13)  0 (0.0) | 26 (72)  2 (6)  8 (22)  0 (0) |
| Numbers of social media used, 0/1/2/≥3, (%) | 31/65/0/4 | 33/42/17/8 | 61/25/14/0 |
| Motivation for pulmonary tele rehabilitation (0-10), median (IQR) | 10 (8-10) | 5 (0-5) | 0 (0-2) |
| Data are presented as mean (SD) except where otherwise indicated. Between group difference not tested. # activePAL™ triaxial accelerometer worn 24 hours per day for five days by in total 61 patients (survey/survey and interview: 52/9). *Definition of abbreviations:* FEV1, forced expiratory volume in the first second; FVC, forced vital capacity; GOLD, Global initiative for Chronic Obstructive Lung Disease; A/B/C/D, risk stratification; LTOT, Long-tern oxygen therapy; SpO2, arterial oxygen saturation as measured by pulse oximetry; MRC, Medical Research Council; BODE index, body mass index, airflow obstruction, dyspnea, and exercise capacity; SPPB, short physical performance battery; 5 STS, time to five sit-to-stand; CAT, COPD Assessment Test; HADS, hospital anxiety and depression score; EQ-5D, Euro-Qol 5-dimension. | | | |
